# Supplementary material
Source: PubMed Central journal article supplement (PMC6233072)
Supplement: pnas.1809304115.sapp.pdf [file pnas.1809304115.sapp.pdf]

## Supporting Information

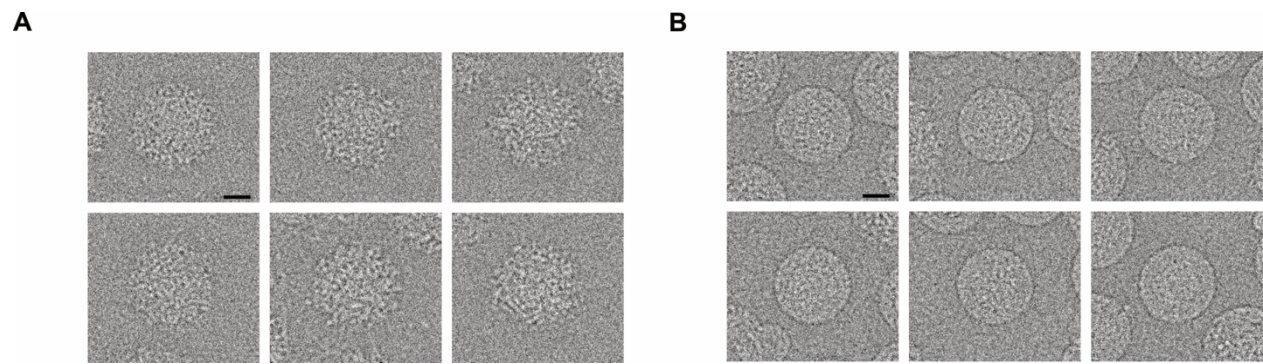

**Figure S1.** Cryo-EM of immature and mature KUNV. Particles from cryo-electron micrographs of (A) immature “spiky” KUNV and (B) mature “smooth” KUNV. The defocus for these particles was 2-3  $\mu\text{m}$ . Scale bar is 200  $\text{\AA}$ .

**A**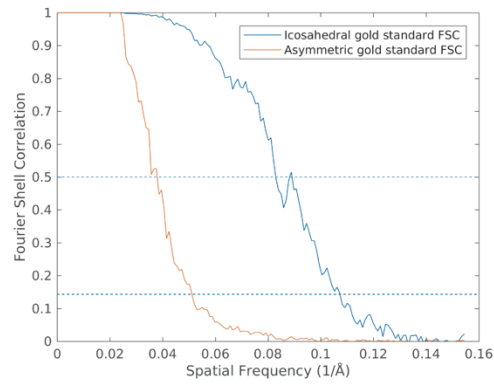**B**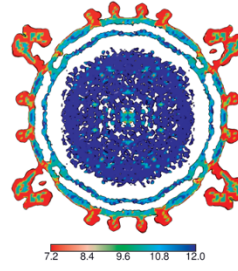**C**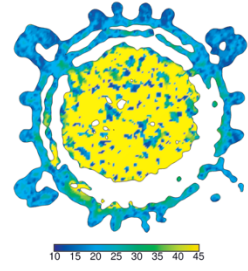**D**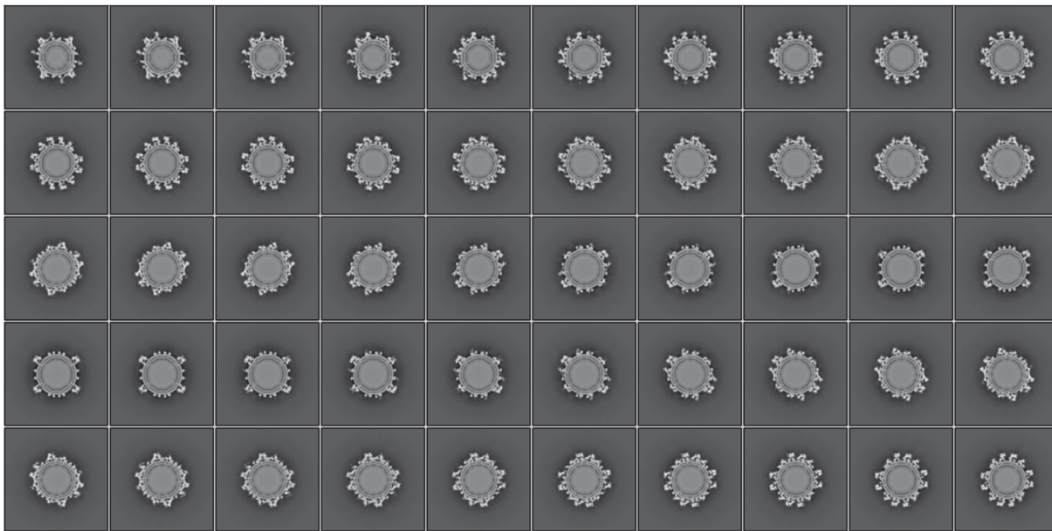**E**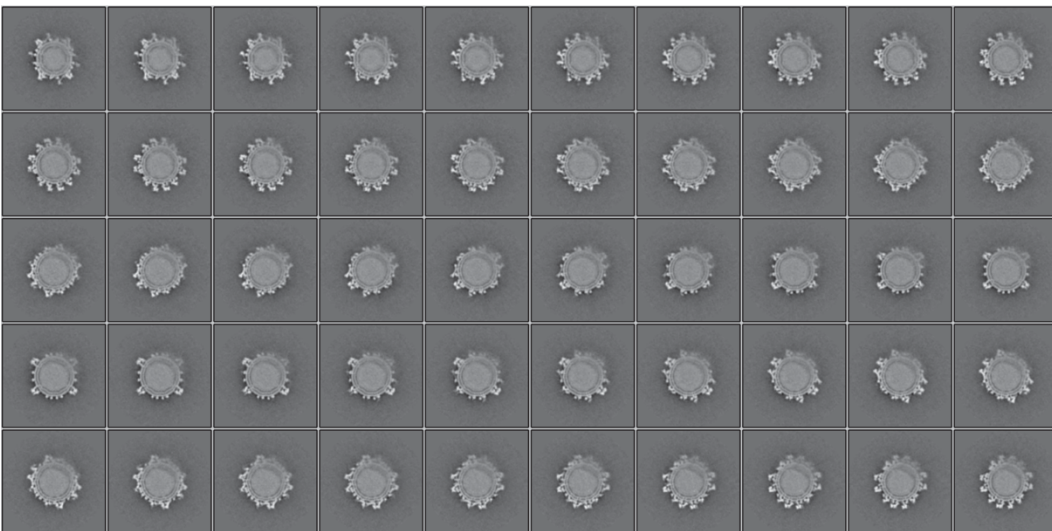

**Figure S2.** Characterization of immature KUNV reconstructions. (A) FSC curves of two random half-sets of icosahedral (blue) and asymmetric (red) reconstructions. (B) Central cross-section of the icosahedral reconstruction colored by local resolution. (C) Central cross-section of the asymmetric reconstruction colored by local resolution. Grayscale sections of (D) icosahedral and (E) asymmetric reconstructions.

**A**

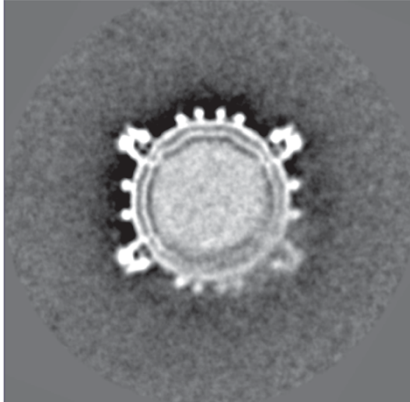

**B**

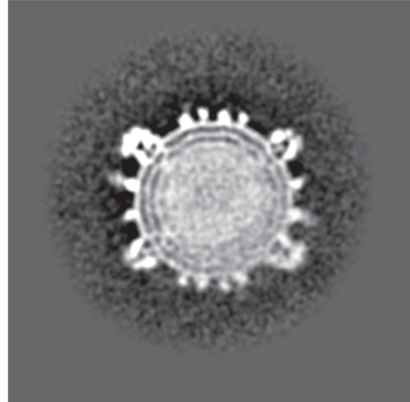

**Figure S3.** Asymmetric reconstructions of flaviviruses. (A) Grayscale central section of the immature KUNV reconstruction. (B) Grayscale central section of the immature ZIKV reconstruction.

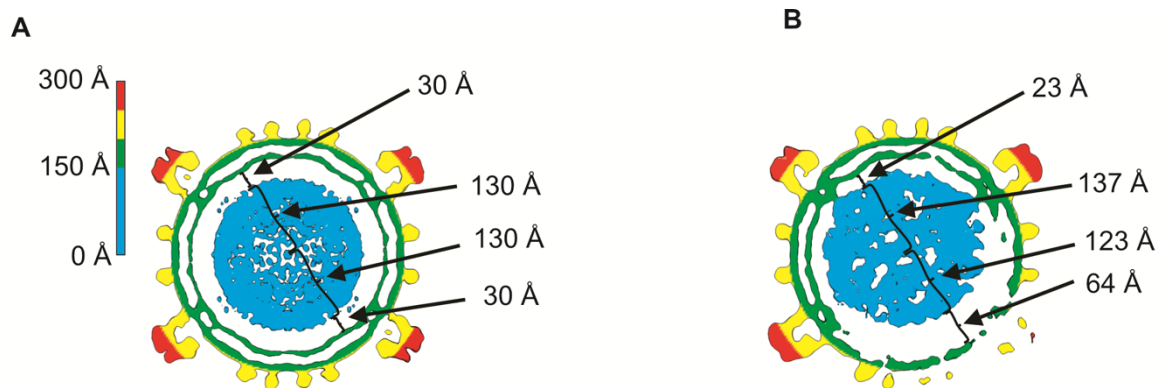

**Figure S4.** Measurements of immature KUNV. (A) Central cross-section of the icosahedral reconstruction colored radially as indicated in color key. (B) Central cross-section of the asymmetric reconstruction.

Reconstructions are contoured at  $3\sigma$ , and arrows indicate distances defined by brackets.

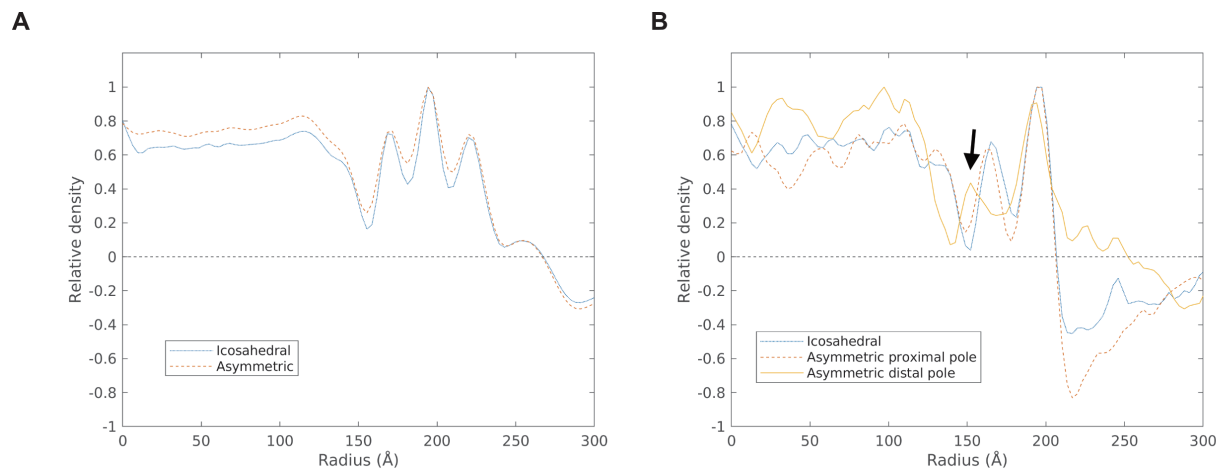

**Figure S5.** Comparison of electron density in immature KUNV reconstructions. (A) Radial density plot of rotationally averaged icosahedral and asymmetric reconstructions. The center of the asymmetric reconstruction was defined by aligning the reconstruction to the icosahedral reconstruction. The icosahedral and asymmetric reconstructions are shown in blue and red, respectively. (B) Radial density plots calculated in the direction of a 5-fold axis. The icosahedral reconstruction was rotated so that a 5-fold axis was positioned along the Z-axis in Chimera. The asymmetric reconstruction was aligned to the icosahedral reconstruction, by aligning the 5-fold axis closest to either the proximal pole or distal pole to the icosahedral 5-fold axis positioned on the Z-axis. The icosahedral radial density plot is shown in blue, and asymmetric radial density plots for the proximal pole and distal pole are shown in red and yellow, respectively. The asymmetric distal and proximal pole share density features such as a peak at  $\sim 195$  Å for the outer leaflet of the membrane. However, the asymmetric distal pole has a distinct density distribution, such as the peak at  $\sim 150$  Å (black arrow) that is not observed in the icosahedral reconstruction or at the proximal pole of the asymmetric reconstruction.

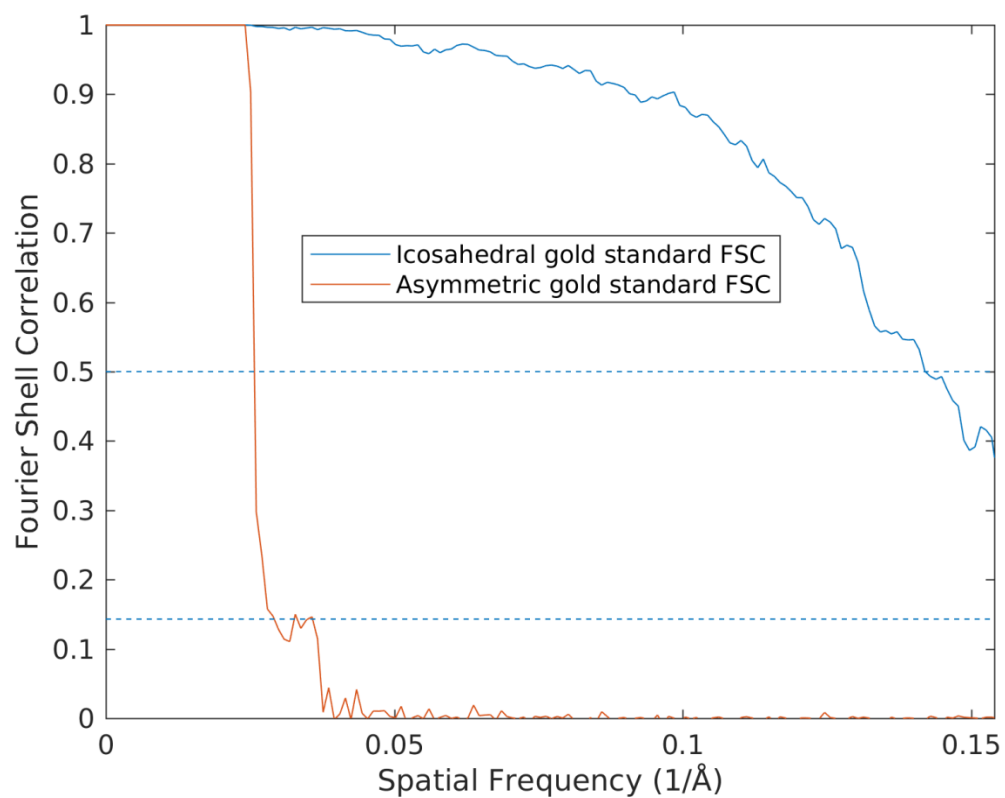

**Fig S6.** Resolution of mature KUNV reconstructions. FSC curves of two random halfsets of the icosahedral (blue) and asymmetric (red) reconstructions. The icosahedral reconstruction reached the Nyquist frequency at a pixel size of 3.24 Å/pixel (4x binned).

**Table S1.** Cryo-EM data collection and processing statistics.

| Dataset                                    | Immature KUNV    | Mature KUNV      |
|--------------------------------------------|------------------|------------------|
| Microscope                                 | Titan Krios      | Titan Krios      |
| Accelerating voltage, kV                   | 300              | 300              |
| Camera                                     | Gatan K2 Summit  | Gatan K2 Summit  |
| Mode                                       | Super-resolution | Super-resolution |
| Number of movies                           | 387              | 369              |
| Pixel size, Å/pixel                        | 0.81             | 0.81             |
| Dose rate, e <sup>-</sup> /pixel/s         | 8                | 8                |
| Total dose, e <sup>-</sup> /Å <sup>2</sup> | 24               | 24               |
| Frame rate, ms                             | 200              | 200              |
| Defocus, μm                                | 0.5-3.0          | 0.5-3.0          |
| Number of particles for reconstruction     | 7,396            | 9,206            |
| Icosahedral resolution, Å                  | 9.3              | 6.4              |
| Asymmetric resolution, Å                   | 19               | 35               |
